# Supplementary material
Source: MDPI journal article supplement (https://www.mdpi.com/2076-3263/11/9/386)

## Supplementary Material

Table S1 - Mineralogical composition from the Alleron area (after [29,39,40]).

| Sample                                   | Meter | Smectite | Saponite | Montmorillonite | Vermiculite | Chlorite/Clinchlore | Mixed phases | Illite | lite/muscovite | Kaolinite | Phyllosilicates | Quartz | K-feldspars | Plagioclases | Heavy Minerals | Calcite | Dolomite  | Reference |
|------------------------------------------|-------|----------|----------|-----------------|-------------|---------------------|--------------|--------|----------------|-----------|-----------------|--------|-------------|--------------|----------------|---------|-----------|-----------|
| M-21A -<br>Allerona                      | 10.00 | 0        |          |                 | 0           | 19                  | 8            | 15     |                | 27        | 69              | 11     | 2           | 5            |                | 11      | 2         | [38]      |
| M-22C -<br>Castelviscardo<br>-Le Fornaci | 1.50  | 0        |          |                 | 3           | 17                  | 10           | 13     |                | 21        | 64              | 11     | 0           | 4            |                | 19      | 3         | [38]      |
| M-22A -<br>Castelviscardo<br>-Le Fornaci | 3.00  | 0        |          |                 | 0           | 14                  | 11           | 14     |                | 16        | 55              | 13     | 2           | 6            |                | 22      | 0         | [38]      |
| M-22B -<br>Castelviscardo<br>-Le Fornaci | 5.00  | 0        |          |                 | 0           | 10                  | 10           | 19     |                | 23        | 62              | 12     | 3           | 5            |                | 18      | 0         | [38]      |
| Allerona 2                               | 27.00 |          |          |                 |             | 30.5                |              |        | 21.<br>5       |           | 52              | 22.2   |             | 13.6         |                | 12.2    |           | [78]      |
| Allerona 2                               | 13.00 |          |          |                 |             | 40.8                |              |        | 22.<br>7       |           | 63.5            | 13.3   |             | 11.5         |                | 10.3    | 1.5       | [78]      |
| Montemoro 2                              | 9.00  |          | 1.4      |                 |             | 29.9                |              |        | 19.<br>2       |           | 50.5            | 14.3   |             | 13.2         |                | 12.6    | 9.5<br>0  | [78]      |
| Montemoro 2                              | 1.00  |          |          |                 |             | 36.7                |              |        | 19.<br>0       |           | 55.7            | 14.0   |             | 11.3         |                | 16.3    | 2.7       | [78]      |
| Montemoro 1                              | 2.00  |          |          |                 |             | 32.3                |              |        | 22.<br>5       |           | 54.8            | 15.2   |             | 13.6         |                | 11.2    | 5.2       | [78]      |
| Bargiano<br>(Cololites)                  |       |          |          |                 |             |                     |              |        |                |           |                 |        |             |              |                |         | 72-<br>81 | [28]      |
| Bargiano<br>(Clay)                       |       |          |          |                 |             |                     |              |        |                |           |                 |        |             |              |                | <15     |           | [28]      |

**Table S2: detail of acquisition parameters used for the GPR dataset of this study.**

| PROFILE<br>NAME | ANTENNA<br>FREQUENCY<br>(MHz) | TIME<br>RANGE<br>(ns) | TOT N°<br>SAMPLES | SAMPLING<br>TIME | N°<br>TRACES | DISTANCE<br>(m) | TRACE<br>DISTANCE |
|-----------------|-------------------------------|-----------------------|-------------------|------------------|--------------|-----------------|-------------------|
| L0              | 300                           | 100                   | 512               | 0.195            | 483          | 24.15           | 0.05              |
| L1              | 500                           | 100                   | 512               | 0.195            | 1318         | 26.36           | 0.02              |
| L2              | 500                           | 100                   | 512               | 0.195            | 687          | 13.74           | 0.02              |
| L3              | 500                           | 100                   | 512               | 0.195            | 577          | 11.54           | 0.02              |
| L4              | 500                           | 100                   | 512               | 0.195            | 1253         | 25.06           | 0.02              |
| L5              | 500                           | 100                   | 512               | 0.195            | 649          | 12.98           | 0.02              |
| L6              | 500                           | 100                   | 512               | 0.195            | 2002         | 40.04           | 0.02              |
| L7              | 300                           | 100                   | 512               | 0.195            | 798          | 39.90           | 0.05              |
| L8              | 300                           | 100                   | 512               | 0.195            | 522          | 26.10           | 0.05              |
| L9              | 300                           | 100                   | 512               | 0.195            | 649          | 32.45           | 0.05              |
| L10             | 300                           | 100                   | 512               | 0.195            | 515          | 25.75           | 0.05              |
| L11             | 300                           | 100                   | 512               | 0.195            | 252          | 12.60           | 0.05              |
| L12             | 300                           | 100                   | 512               | 0.195            | 256          | 12.80           | 0.05              |
| L13             | 300                           | 100                   | 512               | 0.195            | 422          | 21.10           | 0.05              |
| L14             | 300                           | 100                   | 512               | 0.195            | 347          | 17.35           | 0.05              |
| L15             | 300                           | 100                   | 512               | 0.195            | 626          | 31.30           | 0.05              |
| L16             | 300                           | 100                   | 512               | 0.195            | 657          | 32.85           | 0.05              |
| L17             | 300                           | 100                   | 512               | 0.195            | 671          | 33.55           | 0.05              |
| L18             | 300                           | 100                   | 512               | 0.195            | 433          | 21.65           | 0.05              |
| L19             | 300                           | 100                   | 512               | 0.195            | 474          | 23.70           | 0.05              |
| L20             | 300                           | 100                   | 512               | 0.195            | 453          | 22.65           | 0.05              |
| L21             | 300                           | 100                   | 512               | 0.195            | 414          | 20.70           | 0.05              |
| L22             | 300                           | 100                   | 512               | 0.195            | 216          | 10.80           | 0.05              |
| L23             | 300                           | 100                   | 512               | 0.195            | 262          | 13.10           | 0.05              |
| L24             | 300                           | 100                   | 512               | 0.195            | 512          | 25.60           | 0.05              |
| L25             | 300                           | 100                   | 512               | 0.195            | 468          | 23.40           | 0.05              |
| L26             | 300                           | 100                   | 512               | 0.195            | 472          | 23.60           | 0.05              |
| L27             | 300                           | 100                   | 512               | 0.195            | 459          | 22.95           | 0.05              |
| L28             | 300                           | 100                   | 512               | 0.195            | 367          | 18.35           | 0.05              |
| L29             | 300                           | 100                   | 512               | 0.195            | 321          | 16.05           | 0.05              |

Figure S1 - Geotechnical classification (Skempton's Diagram) of deposits from Alleron area (including Bargiano site, modified after [40]), showing main presence of low activity clay in the clay fraction.

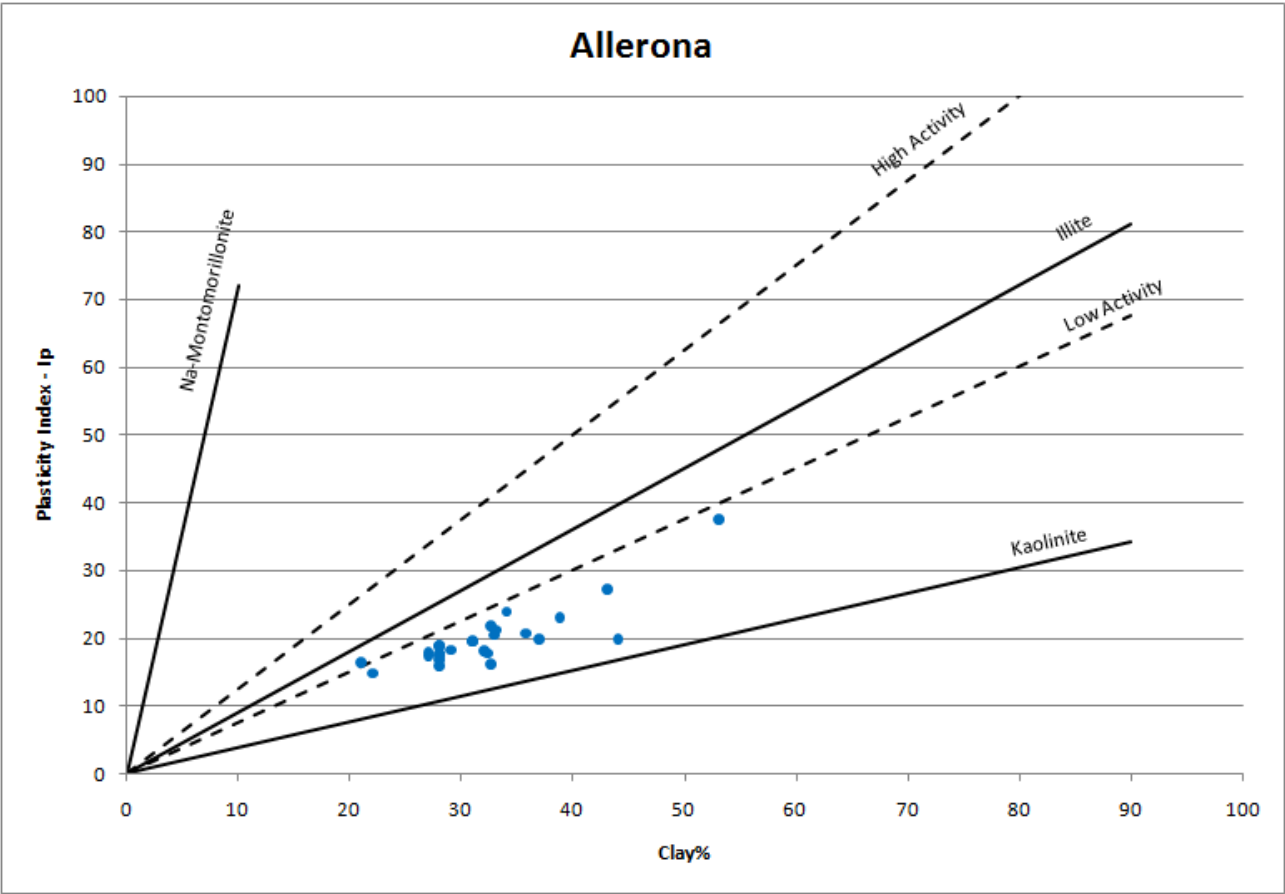

Supplement: s1 [file s1]
